# Supplementary material for: The impact on incident tuberculosis by kidney function impairment status: analysis of severity relationship
Source: Respir Res. 2020 Feb 12;21:51. doi: 10.1186/s12931-020-1294-5 (PMC7017479; doi:10.1186/s12931-020-1294-5)
Supplement: Supplementary file 1 — Additional file 1 Table S1. Demographics of study population according to development of tuberculosis (TB). Table S2. Incidence rates of tuberculosis (TB) if we excluded patients lost to follow up < 30 days. Table S3. Incidence rates of tuberculosis (TB) if we excluded patients lost to follow up < 180 days. [file 12931_2020_1294_MOESM1_ESM.docx]

**Additional File**

Original Article title

**The impact on incident tuberculosis by kidney function impairment status: analysis of severity relationship**

Chin-Chung Shu1,2, Chung-Yu Chen2,3, Yi-Chun Yeh4, Hsien-Ho Lin5, Yu-Feng Wei6, Ping-Huai Wang7, Shih-Lung Cheng7, Jann-Yuan Wang1,2, Chong-Jen Yu1,2

**Institutions:**

1Department of Internal Medicine, National Taiwan University Hospital, Taipei, Taiwan

2College of Medicine, National Taiwan University, Taipei, Taiwan

3Department of Internal Medicine, National Taiwan University Hospital Yunlin Branch, Yunlin County, Taiwan

4Department of Medical Research, National Taiwan University Hospital

5College of Public Health, National Taiwan University, Taipei, Taiwan

6Department of Internal Medicine, E-Da Hospital, Kaohsiung city, Kaohsiung, Taiwan

7Department of Internal Medicine, Far-Eastern Memorial Hospital, New Taipei city, Taiwan

**Corresponding author**:

Chung-Yu Chen, MD, PhD.

Division of Pulmonary and Critical Care Medicine, Department of Internal Medicine, National Taiwan University Hospital Yunlin Branch

No.579, Sec. 2, Yunlin Rd., Douliu City, Yunlin County 640, Taiwan (R.O.C.)

Tel: 886-5-5323911-5675

Fax: 886-5-5335373

E-mail: [c8101147@ms16.hinet.net](mailto:c8101147@ms16.hinet.net)

**Running Title:** TB risk in patients with different kidney functions

Table S1. Demographics of study population according to development of tuberculosis (TB)

| Variables | TB  (n = 1012) | Non-TB  (n = 288567) | *P*-value |
| --- | --- | --- | --- |
| Age (years) | 64.6 ± 16.5 | 51.7 ± 17.3 | < 0.0001 |
| Age group |  |  | < 0.0001 |
| ≤ 40 | 95 (9.4) | 81578 (28.3) |  |
| 40–55 | 162 (16.0) | 78335 (27.2) |  |
| 55–65 | 202 (20.0) | 59649 (20.7) |  |
| > 65 | 553 (54.6) | 69005 (23.9) |  |
| Male | 670 (66.2) | 130475 (45.2) | < 0.0001 |
| eGFR | 80.7 ± 34.3 | 87.3 ± 25.9 | < 0.0001 |
| Kidney function status |  |  | < 0.0001 |
| CKD nil or stage 1 | 362 (35.8) | 129059 (44.7) |  |
| CKD stage 2 | 395 (39.0) | 127853 (44.3) |  |
| CKD stage 3a | 120 (11.9) | 17108 (5.9) |  |
| CKD stage 3b | 64 (6.3) | 7052 (2.4) |  |
| CKD stage 4 | 37 (3.7) | 3412 (1.2) |  |
| CKD stage 5 | 22 (2.2) | 2478 (0.9) |  |
| Long-term dialysis | 10 (1.0) | 1569 (0.5) |  |
| Kidney transplant | 2 (0.2) | 36 (0.0) |  |
| COPD | 43 (4.3) | 3105 (1.1) | < 0.0001 |
| Asthma | 19 (1.9) | 3335 (1.2) | 0.0322 |
| Bronchiectasis† | 14 (1.4) | 884 (0.3) | < 0.0001 |
| Pneumoconiosis† | 9 (0.9) | 96 (0.0) | < 0.0001 |
| IPF† | 4 (0.4) | 414 (0.1) | 0.0604 |
| GERD | 48 (4.7) | 10192 (3.5) | 0.0373 |
| Obesity | 1 (0.1) | 1650 (0.6) | 0.0461 |
| Cancer | 255 (25.2) | 36520 (12.7) | < 0.0001 |
| Cirrhosis | 24 (2.4) | 3651 (1.3) | 0.0017 |
| Congestive heart failure | 39 (3.9) | 4052 (1.4) | < 0.0001 |
| Stroke | 14 (1.4) | 2974 (1.0) | 0.2676 |
| Diabetes mellitus | 190 (18.8) | 29386 (10.2) | < 0.0001 |
| SLE† | 16 (1.6) | 1299 (0.5) | < 0.0001 |
| RA | 13 (1.3) | 1643 (0.6) | 0.0026 |
| Polymyositis† | 0 (0.0) | 106 (0.0) | 1.0000 |
| Dermatomyositis† | 1 (0.1) | 123 (0.0) | 0.3522 |
| Transplant, others†* | 4 (0.4) | 488 (0.2) | 0.0956 |

**Abbreviation:** CKD, chronic kidney disease; COPD, chronic obstructive pulmonary disease; eGFR, estimated glomerular filtration rate; GERD, gastroesophageal reflux disease; IPF, idiopathic pulmonary fibrosis; RA, rheumatoid arthritis; SLE, systemic lupus erythematosus

The number means mean ± standard deviation and number (%)

Chi-square tests for categorical variables; t tests for continuous variables.

† Comparison by Fisher’s exact test.

*Other than kidney transplant.

Table S2. Incidence rates of tuberculosis (TB) (N = 313043, TB event = 1203) if we excluded patients lost to follow up < 30 days.

| Variable | HR | 95% CI | | *P*-value | TB events | N | Follow up (years) | Incidence rate  (per 100000 person-years) |
| --- | --- | --- | --- | --- | --- | --- | --- | --- |
| Kidney function |  |  |  |  |  |  |  |  |
| CKD nil or stage 1 | Reference |  |  |  | 430 | 139673 | 518239.18 | 82.97 |
| CKD stage 2 | 1.033 | 0.906 | 1.178 | 0.6231 | 468 | 138197 | 557235.84 | 83.99 |
| CKD stage 3a | 2.355 | 1.945 | 2.851 | < 0.0001 | 139 | 18825 | 71816.29 | 193.55 |
| CKD stage 3b | 3.340 | 2.624 | 4.252 | < 0.0001 | 78 | 7877 | 28037.44 | 278.20 |
| CKD stage 4 | 4.120 | 3.011 | 5.637 | < 0.0001 | 43 | 3941 | 12204.90 | 352.32 |
| CKD stage 5 | 4.643 | 3.146 | 6.852 | < 0.0001 | 27 | 2735 | 6333.05 | 426.33 |
| Long-term dialysis | 3.295 | 2.001 | 5.428 | < 0.0001 | 16 | 1755 | 5720.55 | 279.69 |
| Kidney transplant | 17.045 | 4.249 | 68.371 | < 0.0001 | 2 | 40 | 140.16 | 1426.98 |

**Abbreviation:** CKD, chronic kidney disease

Table S3. Incidence rates of tuberculosis (TB) (N = 272946, TB event = 884) if we excluded patients lost to follow up < 180 days.

| Variable | HR | 95% CI | | *P*-value | TB events | N | Follow up (years) | Incidence rate  (per 100000 person-years) |
| --- | --- | --- | --- | --- | --- | --- | --- | --- |
| Kidney function |  |  |  |  |  |  |  |  |
| CKD nil or stage 1 | Reference |  |  |  | 322 | 122282 | 514168.67 | 62.63 |
| CKD stage 2 | 0.998 | 0.858 | 1.162 | 0.9827 | 346 | 121002 | 553181.36 | 62.55 |
| CKD stage 3a | 2.351 | 1.886 | 2.931 | < 0.0001 | 105 | 16102 | 71163.57 | 147.55 |
| CKD stage 3b | 3.051 | 2.281 | 4.080 | < 0.0001 | 53 | 6589 | 27723.28 | 191.18 |
| CKD stage 4 | 4.129 | 2.856 | 5.969 | < 0.0001 | 31 | 3149 | 12025.58 | 257.78 |
| CKD stage 5 | 4.473 | 2.746 | 7.286 | < 0.0001 | 17 | 2334 | 6243.15 | 272.30 |
| Long-term dialysis | 2.557 | 1.318 | 4.959 | 0.0055 | 9 | 1454 | 5647.34 | 159.37 |
| Kidney transplant | 11.618 | 1.634 | 82.596 | 0.0143 | 1 | 34 | 138.47 | 722.17 |

**Abbreviation:** CKD, chronic kidney disease
